# Supplementary material for: Reciprocal changes in DNA methylation and hydroxymethylation and a broad repressive epigenetic switch characterize FMR1 transcriptional silencing in fragile X syndrome
Source: PubMed Central journal article supplement (PMC4743126; doi:10.1186/s13148-016-0181-x), 2016-02-05
Supplement: 13148_2016_181_MOESM7_ESM.pdf [file 13148_2016_181_MOESM7_ESM.pdf]

A

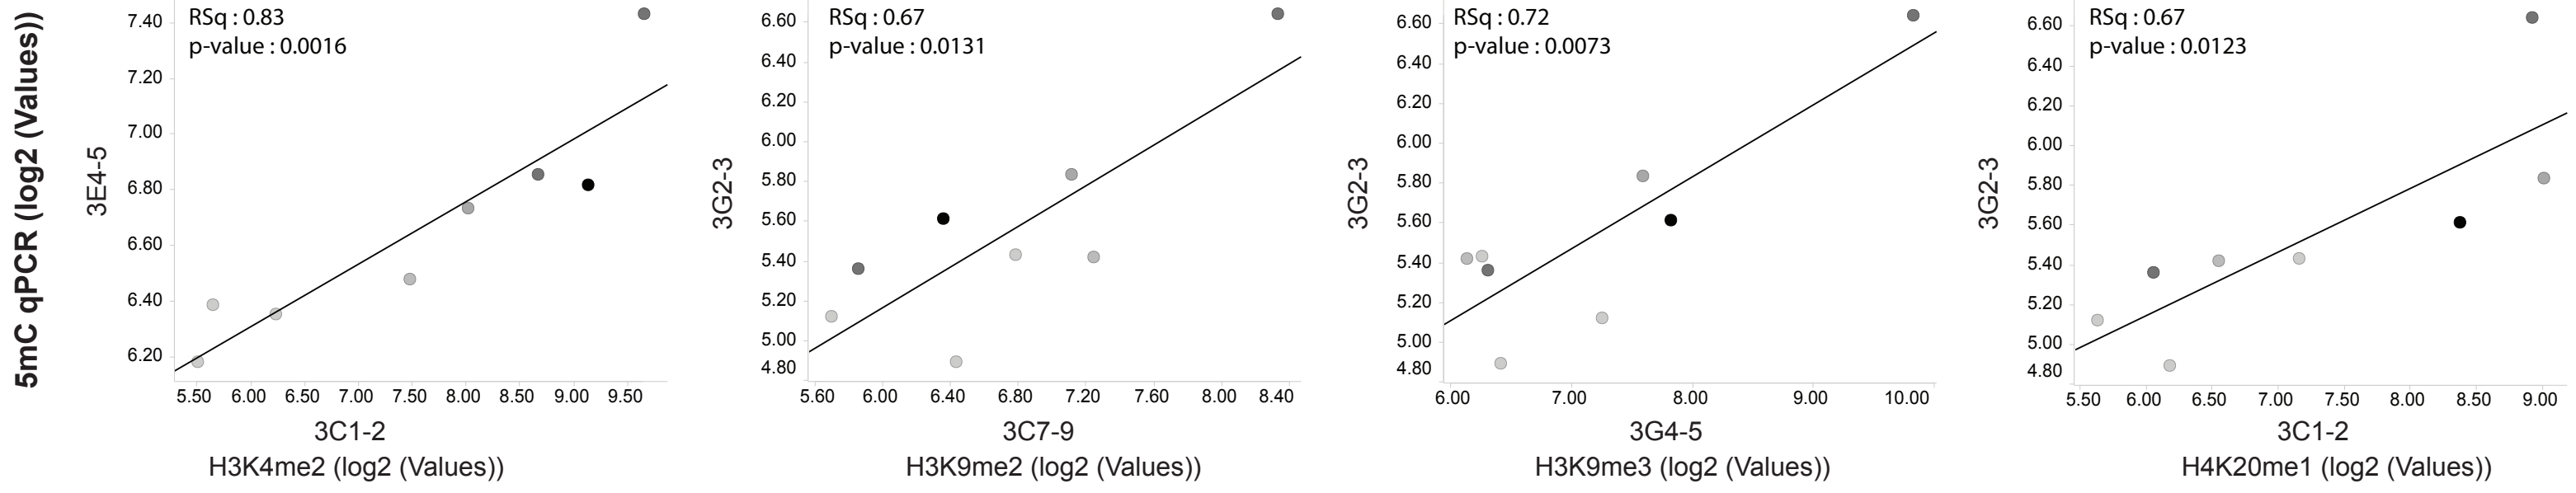

B

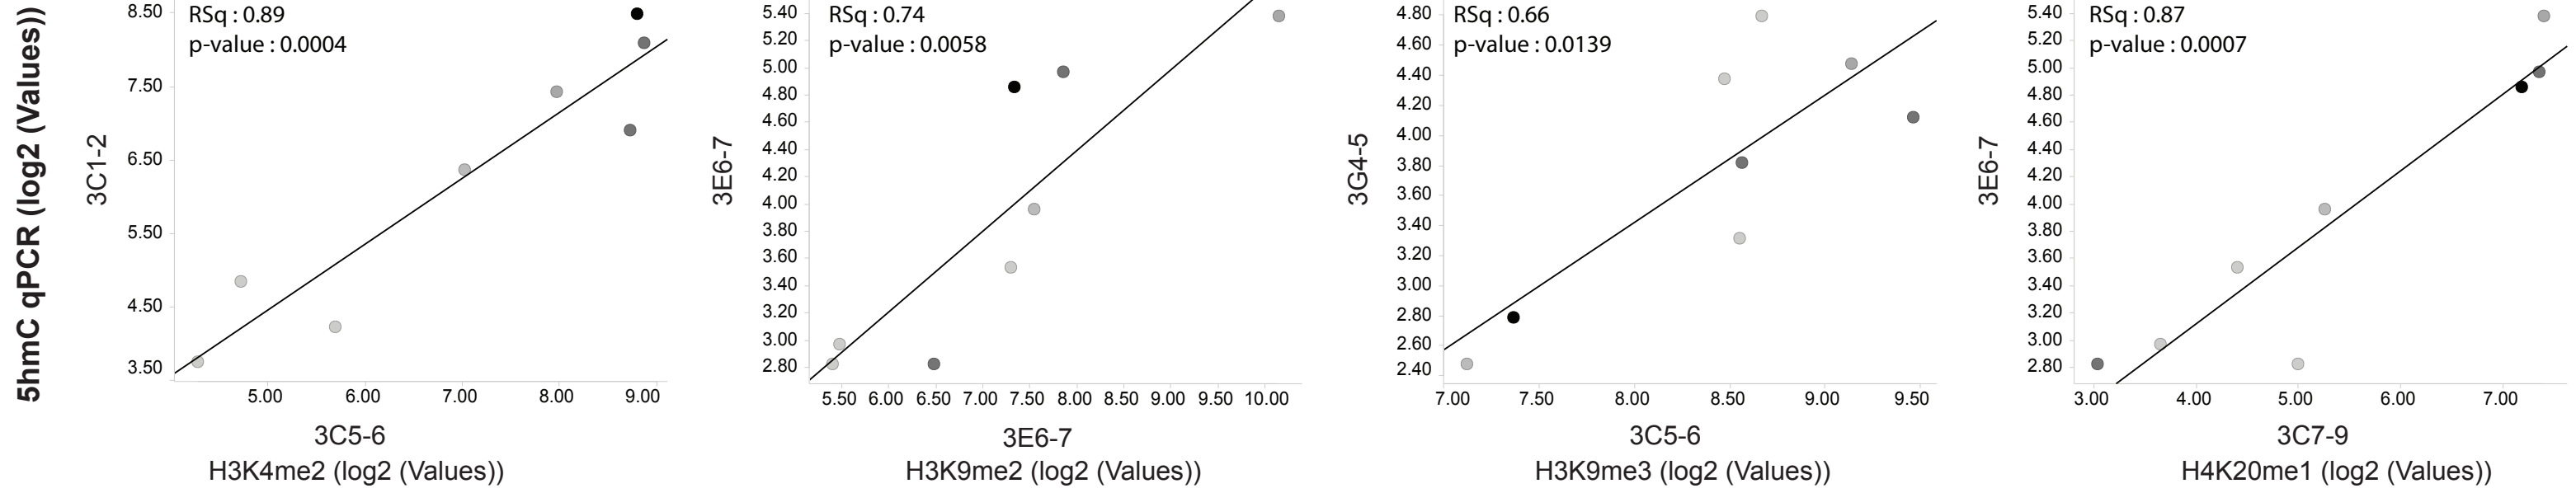

■ mRNA maximum value  
 ■ mRNA minimum value
